# Supplementary material for: Structure evolution of NiMn 2 O 4 -based materials induced by the atmosphere and its impact on dry reforming of methane activity
Source: Royal Society of Chemistry journal article supplement (doi:10.1039/d5cc06064h), 2026-01-01
Supplement: d5cc06064h2.pdf [file d5cc06064h2.pdf]

1 **Supporting Information**

2 **Structure evolution of NiMn<sub>2</sub>O<sub>4</sub>-based materials induced by**  
3 **atmosphere and its impact on dry reforming of methane**  
4 **activity**

5  
6 Jun Duan,<sup>a</sup> Xueying Zheng,<sup>a</sup> Shiyang Fan,<sup>a</sup> Shaomin Liu,<sup>b</sup> and Xinyong Li<sup>\*a</sup>

7  
8 *<sup>a</sup>State Key Laboratory of Fine Chemicals, Key Laboratory of Industrial Ecology and*  
9 *Environmental Engineering (MOE), School of Environmental Science and Technology,*  
10 *Dalian University of Technology, Dalian 116024, PR China*

11 *<sup>b</sup>Dongguan Key Laboratory of Intelligent Equipment and Smart Industry, School of*  
12 *Engineering, Great Bay University, Dongguan 523000, China.*

13  
14  
15  
16  
17  
18  
19  
20  
21  
22  
23  
24  
25 **Corresponding author:**

26 Email address: [xyli@dlut.edu.cn](mailto:xyli@dlut.edu.cn) (X. Li);

## 28 1. Experiment

### 29 1.1. Chemicals and materials

30 The reagents used include nickel nitrate hexahydrate ( $\text{Ni}(\text{NO}_3)_2 \cdot 4\text{H}_2\text{O}$ , 98.0%),  
31 manganese nitrate tetrahydrate ( $\text{Mn}(\text{NO}_3)_2 \cdot 6\text{H}_2\text{O}$ , 98.0%), glycerol ( $\geq 99.0\%$ , 1.250-  
32 1.264 g  $\text{mL}^{-1}$  at 20 °C), isopropanol ( $\geq 99.7\%$ , 0.784-0.786 g  $\text{mL}^{-1}$  at 20 °C), and  
33 ethanol ( $\geq 99.7\%$ , 0.789-0.791  $\text{mL}^{-1}$  at 20 °C).

### 34 1.2. Materials synthesis

35 A homogeneous solution was prepared by dissolving 0.25 mmol of  
36  $\text{Ni}(\text{NO}_3)_2 \cdot 4\text{H}_2\text{O}$  and 0.5 mmol of  $\text{Mn}(\text{NO}_3)_2 \cdot 6\text{H}_2\text{O}$  in 80 mL of isopropanol  
37 containing 16 mL of glycerol under continuous stirring. After magnetically stirring at  
38 room temperature for 60 min, the well-dispersed solution was transferred into a 100  
39 mL Teflon-lined autoclave and hydrothermally treated at 180 °C for 6 h. The resulting  
40 precipitate was collected by centrifugation, washed with ethanol, and vacuum-dried  
41 overnight. The as-obtained precursor was then annealed in a tube furnace under a gas  
42 flow of 50  $\text{mL min}^{-1}$ . After purging at room temperature for 30 min, the temperature  
43 was raised to 400 °C at a heating rate of 1 °C  $\text{min}^{-1}$  and held for 2 h before cooling to  
44 ambient conditions. Four calcination atmospheres were employed: air, argon (Ar), and  
45 hydrogen ( $\text{H}_2$ ), yielding the  $\text{NiMn}_2\text{O}_4$  materials (NMO) denoted as NMO-Air, NMO-  
46 Ar, and NMO- $\text{H}_2$ . An additional sample, NMO-Air+ $\text{H}_2$ , was synthesized by first  
47 calcining the precursor in air (1 °C  $\text{min}^{-1}$  to 400 °C, 2 h), followed by reduction under  
48  $\text{H}_2$  using the same temperature program as the dry reforming of methane (DRM)  
49 activity test (10 °C  $\text{min}^{-1}$  to 400 °C, 2 h).

### 50 1.3. Characterizations

51 The X-ray diffraction (XRD) patterns were recorded by using a BRUKER D8  
52 ADVANCE equipped with Cu K $\alpha$  radiation. Fourier transform infrared reflection  
53 (FTIR) spectra were collected on a BRUKER VERTEX 70 FTIR spectrometer. The  
54 Raman spectra were performed via a Renishaw inVia Qontor. The scanning electron  
55 microscopy (SEM) and transmission electron microscopy (TEM) images were  
56 measured on SU5000 ultrahigh resolution field emission scanning electron  
57 microscopy and FEI Tecnai G2F30 STWIN, respectively. Concurrently, the elemental  
58 composition of the catalyst was further examined using X-ray energy dispersive  
59 spectroscopy (EDS). N<sub>2</sub> adsorption-desorption isotherms were studied on a  
60 Quantachrome equipment (NOVA 4200e) instrument to analyze the surface area and  
61 pore size distribution. X-ray photoelectron spectroscopy (XPS) was recorded in a  
62 Thermos K-Alpha+ spectrometer. Low-temperature electron paramagnetic resonance  
63 (EPR) was conducted by a Bruker A300 Electron Paramagnetic Resonance  
64 Spectrometer from Germany.

65 *In-situ* temperature-programmed (TP) experiments were conducted using a  
66 chemisorption analyzer (manufactured by Anton Paar, America). Here, 50 mg  
67 catalysts were paced into a U-shaped quartz tube for chemisorption tests. For  
68 hydrogen temperature-programmed reduction experiments (H<sub>2</sub>-TPR), the apparatus  
69 was equipped with a cold trap containing a gel mixture of isopropyl alcohol and liquid  
70 nitrogen. Initially, the samples were pretreated at 200 °C in a high-purity helium  
71 atmosphere (30 mL min<sup>-1</sup>) for 30 min and cooled down to room temperature naturally.

72 Then, the temperature was gradually increased to 800 °C at a heating rate of 10 °C  
73 min<sup>-1</sup> in a 10% H<sub>2</sub>/Ar mixture atmosphere (30 mL/min). For a series of temperature-  
74 programmed desorption experiments (NH<sub>3</sub>-TPD/CO<sub>2</sub>-TPD/O<sub>2</sub>-TPD), the samples  
75 were pretreated at 200 °C in a high-purity helium atmosphere (30 mL min<sup>-1</sup>) for 30  
76 min. After cooling down to room temperature naturally, the samples were exposed to  
77 the 10% mixture (NH<sub>3</sub>/Ar, CO<sub>2</sub>/Ar, O<sub>2</sub>/Ar) atmosphere (30 mL min<sup>-1</sup>) for 1 h until  
78 achieving adsorption saturation. Then, the samples were purged in a helium  
79 atmosphere at room temperature at a flow rate of 30 mL min<sup>-1</sup> for 30 min, followed by  
80 heating from room temperature to 900 °C at a heating rate of 10 °C min<sup>-1</sup>.

#### 81 **1.4. DRM Reaction**

82 The activity tests of DRM were carried out continuously in a fix bed system. In  
83 each reaction, 50 mg of screened 40-60 mesh samples were placed in the quartz tube  
84 with quartz cotton placed at both ends to prevent leakage. The quartz tube was  
85 installed in the YDL type electric heating furnace of the *in-situ* evaluation system. In a  
86 typical DRM reaction, the catalyst was pretreated in an Ar atmosphere (30 mL min<sup>-1</sup>)  
87 by heating to 300 °C at a heating rate of 10 °C min<sup>-1</sup> for 30 min. Then, the mixture gas  
88 of CH<sub>4</sub>/CO<sub>2</sub>/Ar=1/1/3 (30 mL min<sup>-1</sup>) was introduced and heated to 700 °C at a heating  
89 rate of 10 °C min<sup>-1</sup> and maintained every 50 °C for 60 min for reaction and data  
90 collection. To detecting the change of gas composition, the tail gas was continuously  
91 introduced into a gas chromatograph (GC7890A, manufactured by Agilent  
92 Technologies Co., LTD.). The GC apparatus was equipped with TCD detector, PQ  
93 and 5A equipped as chromatographic columns, with Ar as carrier gas. The DRM

94 performances were studied based on CH<sub>4</sub> and CO<sub>2</sub> conversion rates ( $\chi_{CH_4}$ ,  $\chi_{CO_2}$ ), and  
95 H<sub>2</sub>/CO ratio. The produced syngas productivity was calculated by ideal gas equation.

96 
$$\chi_{CH_4}(\%) = (A_{CH_4}^{in} - A_{CH_4}^{out}) / A_{CH_4}^{in} \times 100\% \#(1)$$

97 
$$\chi_{CO_2}(\%) = (A_{CO_2}^{in} - A_{CO_2}^{out}) / A_{CO_2}^{in} \times 100\% \#(2)$$

98 
$$H_2/CO = V_{H_2}/V_{CO} \#(3)$$

99 Where  $A_{CH_4}^{in}$ ,  $A_{CH_4}^{out}$ ,  $A_{CO_2}^{in}$ ,  $A_{CO_2}^{out}$ , represent the integral area of inward and  
100 outward of CH<sub>4</sub>, CO<sub>2</sub>;  $V_{H_2}$ ,  $V_{CO}$ , refer to the volume of H<sub>2</sub> and CO detected by GC,  
101 respectively.

102

## 103 2. Figures and Tables

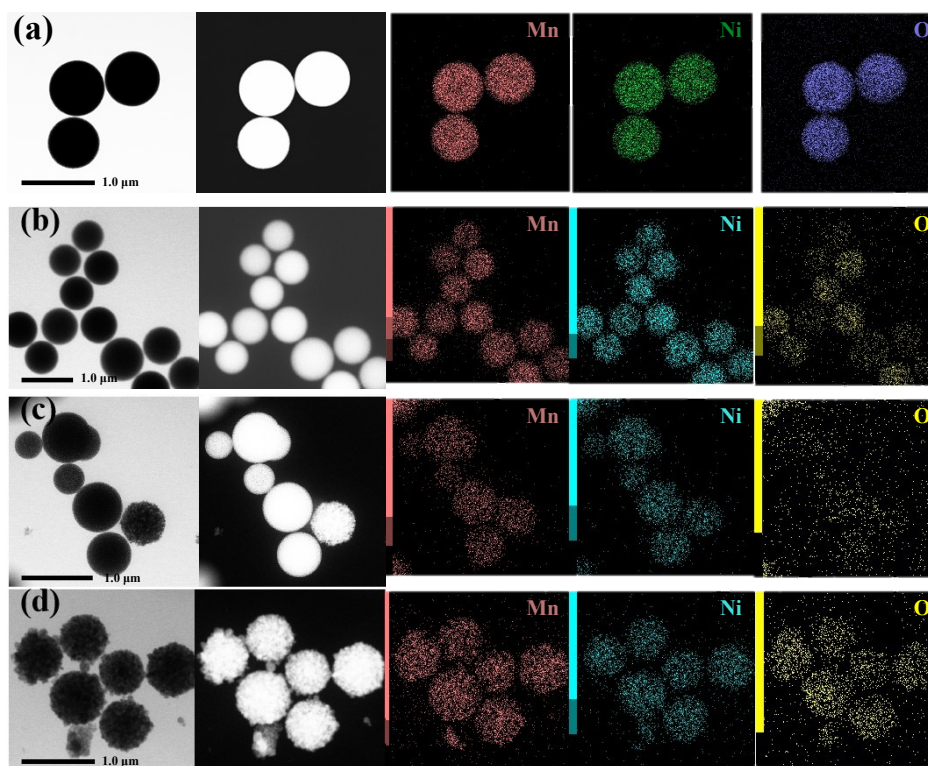

104

105 **Fig. S1** TEM images and EDS mapping of catalysts after calcination in different  
 106 atmospheres: (a) NMO-Air, (b) NMO-Ar, (c) NMO-Air+H<sub>2</sub>, and (d) NMO-H<sub>2</sub>.

107

108 As the process proceeds, internal O atoms must diffuse through the already  
 109 reduced outer layers to reach the surface, where they were subsequently reduced by  
 110 H<sub>2</sub> and escaped. However, this diffusion pathway was protracted and intricate, likely  
 111 hindered by lattice defects or grain boundaries, ultimately impairing uniform O  
 112 migration to the surface. In contrast, direct H<sub>2</sub> reduction of the precursor enabled  
 113 simultaneous reduction of Ni and Mn oxides, allowing more orderly atomic diffusion  
 114 and facilitating homogeneous Ni/MnO formation.

115

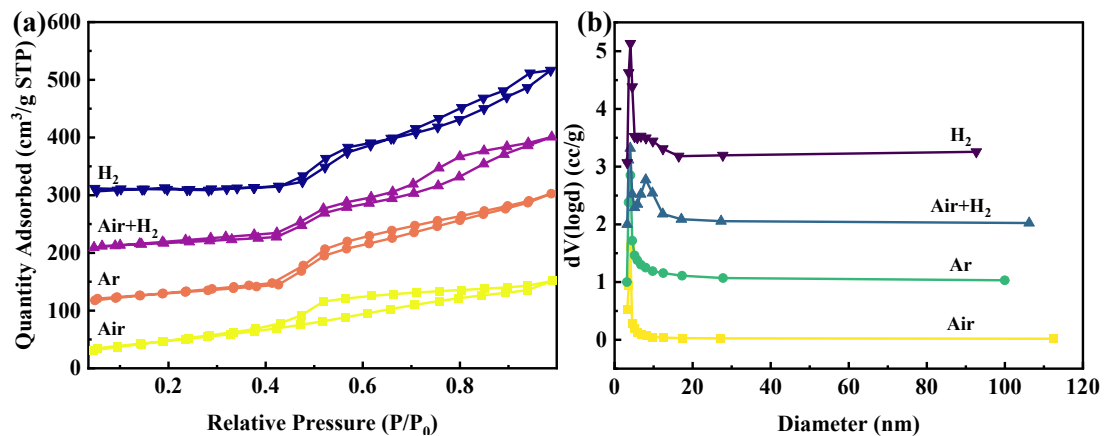

116

117 **Fig. S2** (a) The N<sub>2</sub> adsorption-desorption isotherms and (b) pore diameter distribution

118

curves.

119

120 **Table. S1** Structural properties and integrated peak area of the total amount of H<sub>2</sub>

121 consumption, CO<sub>2</sub> desorption and NH<sub>3</sub> desorption.

| Sample                 | BET surface<br>area (m <sup>2</sup> g <sup>-1</sup> ) | Pore size<br>(nm) | Pore<br>volume<br>(cm <sup>3</sup> g <sup>-1</sup> ) | H <sub>2</sub><br>consumption<br>peak area<br>(a.u.) | CO <sub>2</sub><br>desorption<br>peak area<br>(a.u.) | NH <sub>3</sub><br>desorption<br>peak area<br>(a.u.) |
|------------------------|-------------------------------------------------------|-------------------|------------------------------------------------------|------------------------------------------------------|------------------------------------------------------|------------------------------------------------------|
| NMO-Air                | 178.54                                                | 4.026             | 0.220                                                | 17266                                                | 5526                                                 | 6098                                                 |
| NMO-Ar                 | 116.82                                                | 4.060             | 0.386                                                | 33502                                                | 4688                                                 | 7449                                                 |
| NMO-Air+H <sub>2</sub> | 71.595                                                | 4.015             | 0.391                                                | 4383                                                 | 5268                                                 | 5609                                                 |
| NMO-H <sub>2</sub>     | 32.796                                                | 4.052             | 0.598                                                | 2792                                                 | 1826                                                 | 1213                                                 |

122



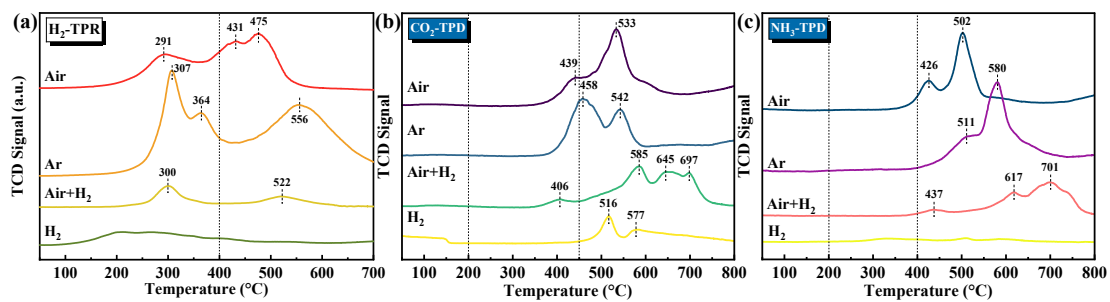

123

124 **Fig. S3** (a) H<sub>2</sub>-TPR, (b) CO<sub>2</sub>-TPD, and (c) NH<sub>3</sub>-TPD of catalysts after calcination in

125

different atmospheres.

126

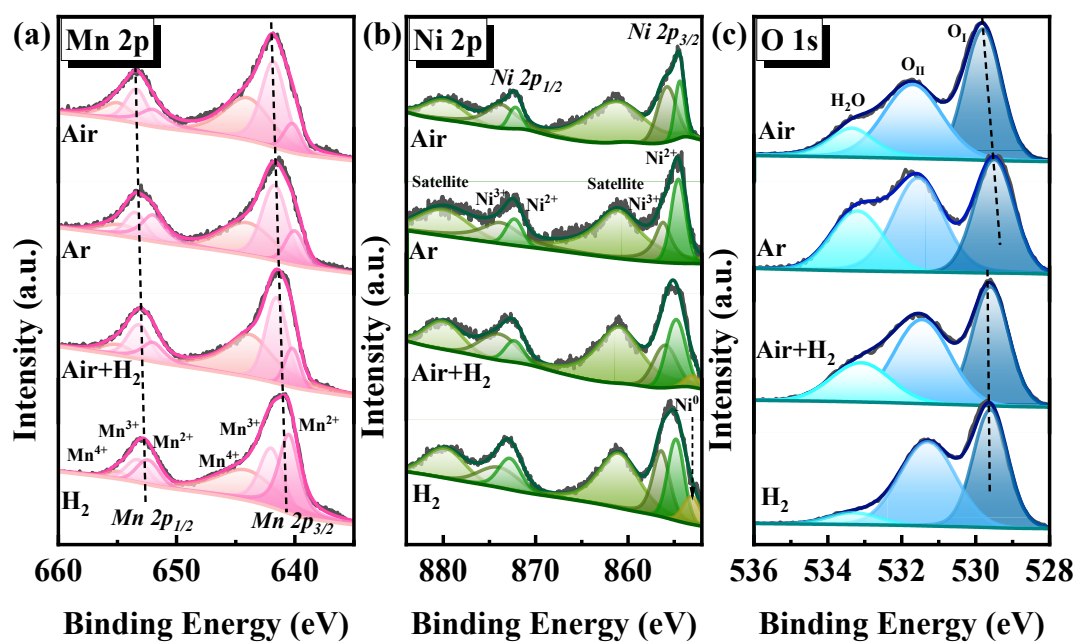

**Fig. S4** XPS spectra of as-prepared catalysts: (a) Mn 2p, (b) Ni 2p, and (c) O 1 s.

130 **Table. S2** The XPS results of the samples

| Sample                 | O species              |                       |                      |
|------------------------|------------------------|-----------------------|----------------------|
|                        | H <sub>2</sub> O ratio | O <sub>II</sub> ratio | O <sub>I</sub> ratio |
| NMO-Air                | 0.12                   | 0.39                  | 0.49                 |
| NMO-Ar                 | 0.29                   | 0.35                  | 0.36                 |
| NMO-Air+H <sub>2</sub> | 0.16                   | 0.46                  | 0.38                 |
| NMO-H <sub>2</sub>     | 0.02                   | 0.50                  | 0.48                 |

131

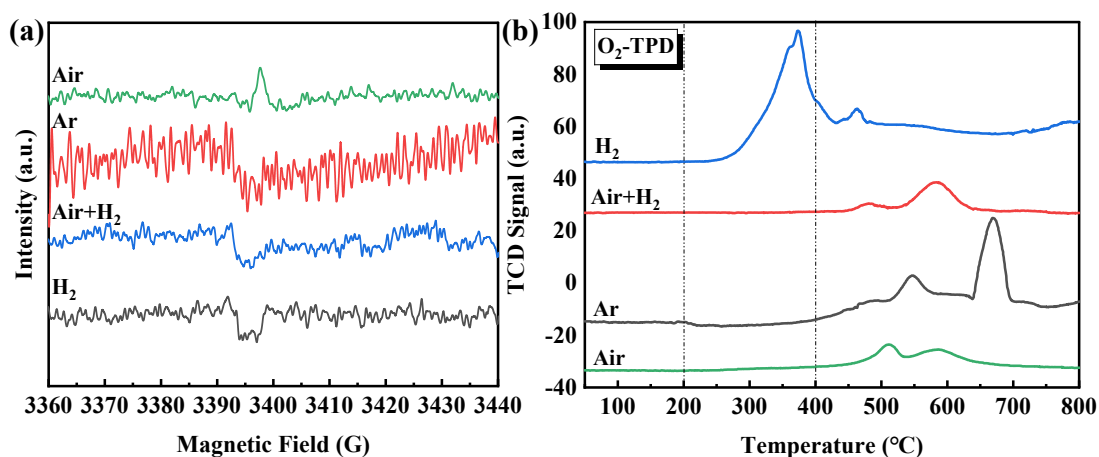

**Fig. S5** The (a) low-temperature EPR and (b) O<sub>2</sub>-TPD of materials.

The O<sub>2</sub>-TPD profiles of all catalysts could be divided into three characteristic temperature regions: < 200 °C, 200-400 °C, and > 400 °C, corresponding to the desorption of chemisorbed oxygen species desorbed from surfaces,<sup>1</sup> surface, and bulk lattice oxygen species,<sup>2</sup> respectively. All samples showed negligible desorption below 200 °C.

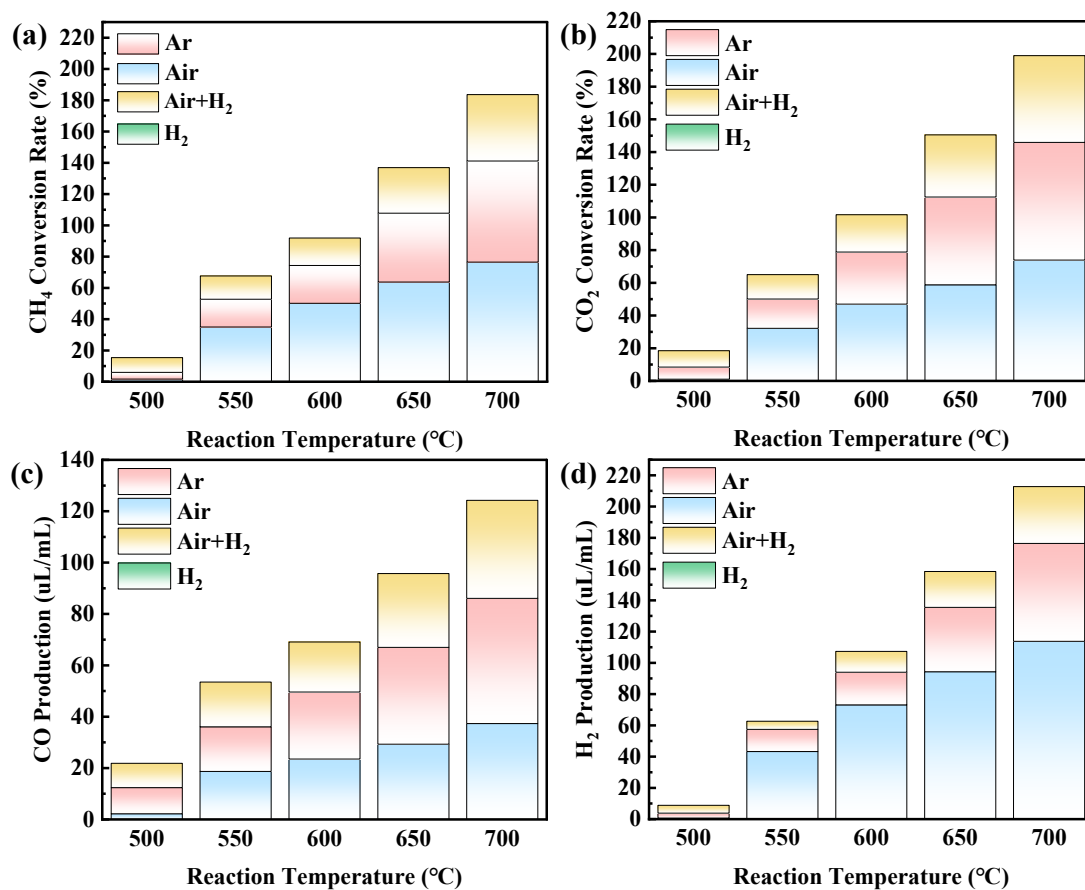

**Fig. S6** The DRM activity: (a) CH<sub>4</sub> conversion rate, (b) CO<sub>2</sub> conversion rate, (c) CO production, and (d) H<sub>2</sub> production.

145 **Table. S3** Performance comparison of developed catalysts in DRM.

| Sample                                                 | Reaction temperature (°C) | Flow rate (mL min <sup>-1</sup> ) | Quality (mg) | Ratio of H <sub>2</sub> /CO | Ref.         |
|--------------------------------------------------------|---------------------------|-----------------------------------|--------------|-----------------------------|--------------|
| NMO-Air                                                | 700                       | 30                                | 50           | 1.2                         | This work    |
| CaZr <sub>0.8</sub> Ni <sub>0.2</sub> O <sub>3-δ</sub> | 800                       | 80                                | 600          | 0.95                        | <sup>3</sup> |
| Ni-CeO <sub>2</sub>                                    | 500                       | GHSV: 48000 h <sup>-1</sup>       |              | 0.7                         | <sup>4</sup> |
| Ni <sub>1</sub> /CoCe                                  | 800                       | 30                                | 100          | 0.95                        | <sup>5</sup> |
| Ni@Co <sub>1</sub> /CeO <sub>2</sub>                   | 800                       | 30                                | 20           | 0.8                         | <sup>6</sup> |
| 55Ni/CeO <sub>2</sub> -G                               | 700                       | 50                                | 100          | 0.8                         | <sup>7</sup> |
| 1.2Ni-0.3Co-SiO <sub>2</sub>                           | 700                       | 20                                | 30           | 0.43                        | <sup>8</sup> |
| N3M/A                                                  | 700                       | 100                               | 200          | 0.8                         | <sup>9</sup> |

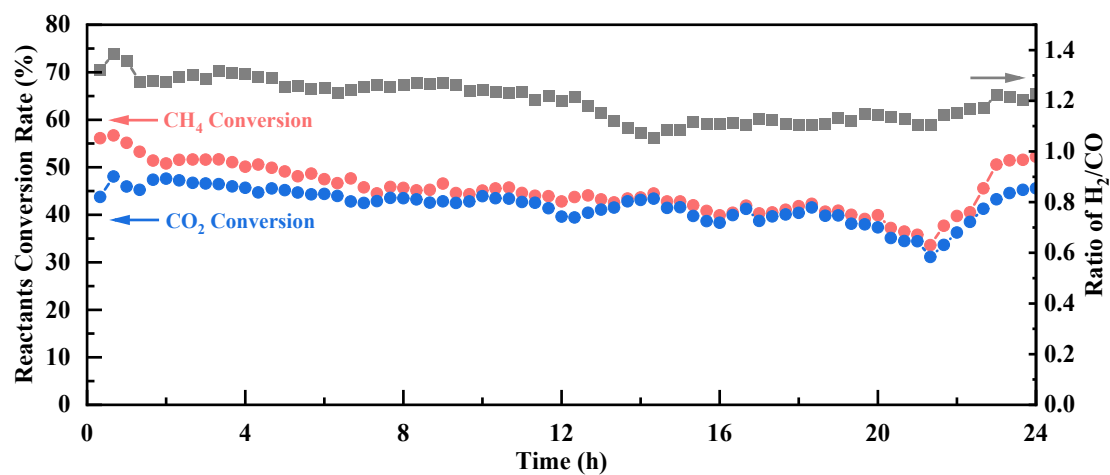

147

148 **Fig. S7** the DRM reaction stability of NMO-Air under 600 °C for 24 h. Flow rate: 30

149 30 mL min<sup>-1</sup> (CH<sub>4</sub>/CO<sub>2</sub>/Ar=1/1/3), catalyst quality: 50 mg.

150

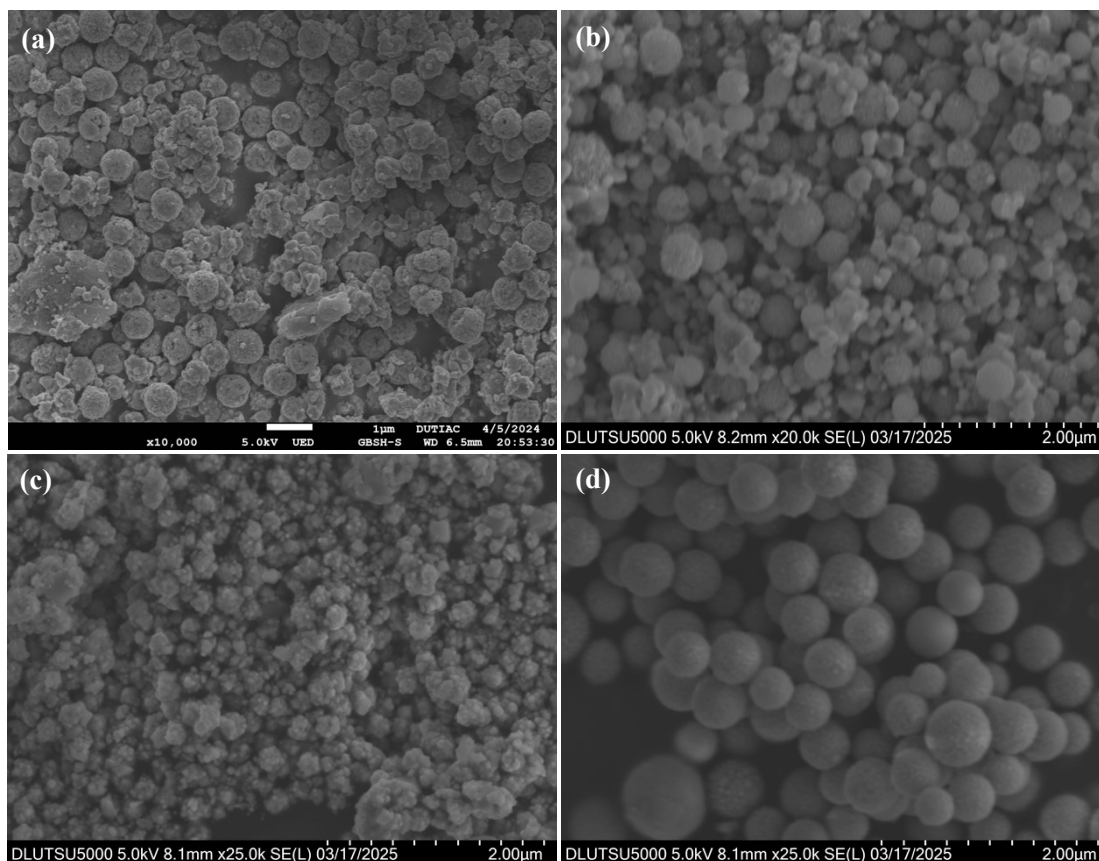

**Fig. S8** The SEM images after reaction: (a) NMO-Air, (b) NMO-Ar, (c) NMO-Air+H<sub>2</sub>, and (d) NMO-H<sub>2</sub>.

The spherical structure of NMO-Ar exhibited partial separation after reaction, attributable to its argon-atmosphere calcination. The inert argon atmosphere provided limited chemical regulation, leading to non-uniform stress distribution and inadequate lattice stability during high-temperature treatment, which aggravated structural separation under DRM conditions. In contrast, NMO-Air+H<sub>2</sub> underwent more severe structural collapse, revealing that hydrogen pretreatment substantially reduces structural stability. The strong reducibility of H<sub>2</sub> might cause excessive reduction of metal ions, disrupting crystalline integrity and diminishing morphological stability under high-temperature reaction conditions. Although catalytically inactive, NMO-H<sub>2</sub>



164 underwent surface reconstruction from rough to smooth, demonstrating that controlled

165 atmosphere treatment can induce morphological optimization.

166

167 **References**

- 168 1. M. Sun, W. Li, B. Zhang, G. Cheng, B. Lan, F. Ye, Y. Zheng, X. Cheng and L.  
169 Yu, *Chem. Eng. J.*, 2018, **331**, 626-635.
- 170 2. N. Huang, Z. Qu, C. Dong, Y. Qin and X. Duan, *Appl. Catal. A Gen.*, 2018, **560**,  
171 195-205.
- 172 3. S. Dama, S. R. Ghodke, R. Bobade, H. R. Gurav and S. Chilukuri, *Appl. Catal. B*  
173 *Environ.*, 2018, **224**, 146-158.
- 174 4. M. Li and A. C. van Veen, *Appl. Catal. B Environ.*, 2018, **237**, 641-648.
- 175 5. J. Wu, J. Gao, S. Lian, J. Li, K. Sun, S. Zhao, Y. D. Kim, Y. Ren, M. Zhang, Q.  
176 Liu, Z. Liu and Z. Peng, *Appl. Catal. B Environ.*, 2022, **314**, 121516.
- 177 6. E. Yang, E. Nam, Y. Jo and K. An, *Appl. Catal. B Environ.*, 2023, **339**, 123152.
- 178 7. H. Xia, C. Dang, D. Zhou and W. Cai, *Chem. Eng. J.*, 2024, **489**, 151365.
- 179 8. J. Zhang, K. Xie, Y. Jiang, M. Li, X. Tan, Y. Yang, X. Zhao, L. Wang, Y. Wang,  
180 X. Wang, Y. Zhu, H. Chen, M. Wu, H. Sun and S. Wang, *ACS Catal.*, 2023, **13**,  
181 10855-10865.
- 182 9. D. Liang, Y. Wang, M. Chen, X. Xie, C. Li, J. Wang and L. Yuan, *Fuel*, 2022,  
183 **321**, 124032.

184
